# Supplementary material for: Identification of a novel selective inhibitor of mutant isocitrate dehydrogenase 1 at allosteric site by docking-based virtual screening
Source: Royal Society of Chemistry journal article supplement (doi:10.1039/c6ra21617j), 2016-01-01
Supplement: c6ra21617j1.pdf [file c6ra21617j1.pdf]

**Table S1** Results of six retrieved compounds for pharmacokinetics parameters obtained from Lipinski's rule of five filter parameters and ADMET descriptors.

| Compd | Lipinski's rule of five |         |         | ADMET parameters                  |                                 |                                 |
|-------|-------------------------|---------|---------|-----------------------------------|---------------------------------|---------------------------------|
|       | mw                      | Num_HBA | Num_HBD | AlogP98 ( $\geq 3$ ) <sup>a</sup> | LogS ( $\geq -6$ ) <sup>a</sup> | PSA ( $\leq 112$ ) <sup>a</sup> |
| FX-01 | 432.877                 | 4       | 1       | 5.737                             | -5.596                          | 90.465                          |
| FX-02 | 437.922                 | 5       | 3       | 3.774                             | -5.04                           | 91.607                          |
| FX-03 | 472.367                 | 5       | 3       | 4.439                             | -5.908                          | 90.532                          |
| FX-04 | 408.495                 | 4       | 1       | 5.839                             | -5.539                          | 80.384                          |
| FX-05 | 401.458                 | 5       | 3       | 3.757                             | -5.986                          | 84.207                          |
| FX-06 | 408.452                 | 5       | 2       | 4.188                             | -5.276                          | 93.651                          |

<sup>a</sup> AlogP98 $\geq 3$ , LogS $\geq -6$  and PSA $\leq 112$  were used as control.
